# Supplementary material for: Anthryl-functionalized cyanide-bridged Fe/Co cubes
Source: Royal Society of Chemistry journal article supplement (doi:10.1039/d3dt01630g), 2023-01-01
Supplement: d3dt01630g1.pdf [file d3dt01630g1.pdf]

## Supporting Information

### **Anthryl-Functionalized Cyanide-Bridged Fe/Co Cubes**

Qi Liu, Yue Cheng, Shihao Liu, Zi-Yi Chen,\* and Yuan-Zhu Zhang\*

# Contents

**Figure S1.** Powder X-ray diffraction (PXRD) pattern of **1**.

**Figure S2.** Powder X-ray diffraction (PXRD) pattern of **2**.

**Figure S3.** Thermal Gravimetric Analysis of **1**.

**Figure S4.** Thermal Gravimetric Analysis of **2**.

**Figure S5.** Solid-state IR spectra at room temperature of **1** and **2**.

**Figure S6.** Variable-temperature magnetic susceptibilities of complex **1**.

**Figure S7.** Variable-temperature magnetic susceptibilities of complex **2**.

**Figure S8.** Solid-state UV-vis spectra of **1**.

**Figure S9.** Solid-state UV-vis spectra of **2**.

**Figure S10.** UV-vis spectra of **1** in MeCN.

**Figure S11** UV-vis spectra of ligand TpEtOAn in MeCN.

**Figure S12.** Solid-state emission ( $\lambda_{\text{ex}} = 350 \text{ nm}$ ) and excitation ( $\lambda_{\text{em}} = 420 \text{ nm}$ ) spectra of complex **1**.

**Figure S13.** Emission ( $\lambda_{\text{ex}} = 350 \text{ nm}$ ) spectra of complex **1** at solid state and in MeCN.

**Figure S14.** Solid-state emission ( $\lambda_{\text{ex}} = 360 \text{ nm}$ ) and excitation ( $\lambda_{\text{em}} = 444 \text{ nm}$ ) spectra of ligand TpEtOAn.

**Figure S15.** Emission ( $\lambda_{\text{ex}} = 350 \text{ nm}$ ) and excitation ( $\lambda_{\text{em}} = 420 \text{ nm}$ ) spectra of complex **2** in MeCN.

**Figure S16.** Excitation ( $\lambda_{\text{em}} = 420 \text{ nm}$ ) spectra of the mixture of **1** and PFN in MeCN.

**Figure S17.** Emission ( $\lambda_{\text{ex}} = 310 \text{ nm}$ ) and excitation ( $\lambda_{\text{em}} = 355 \text{ nm}$ ) spectra of PFN in MeCN.

**Scheme S1.** Synthesis route of ligand TpEtOAn.

**Figure S18.**  $^1\text{H}$  NMR (400 MHz) spectra of TpEtOAn in  $\text{CDCl}_3$ .

**Figure S19.**  $^{13}\text{C}$  NMR (101 MHz) spectra of TpEtOAn in  $\text{CD}_3\text{CN}$ .

**Figure S20.** Anthracene dimmer in crystal of **1** and **2**.

**Table S1.** Single Crystal diffraction data of **1** and **2**.

**Table S2.** The selected bond length of complex **1**.

**Table S3.** Selected bond length of complex **2**.

**Table S4.** Average Co–N bond length and continuous shape measurement of Co centers.

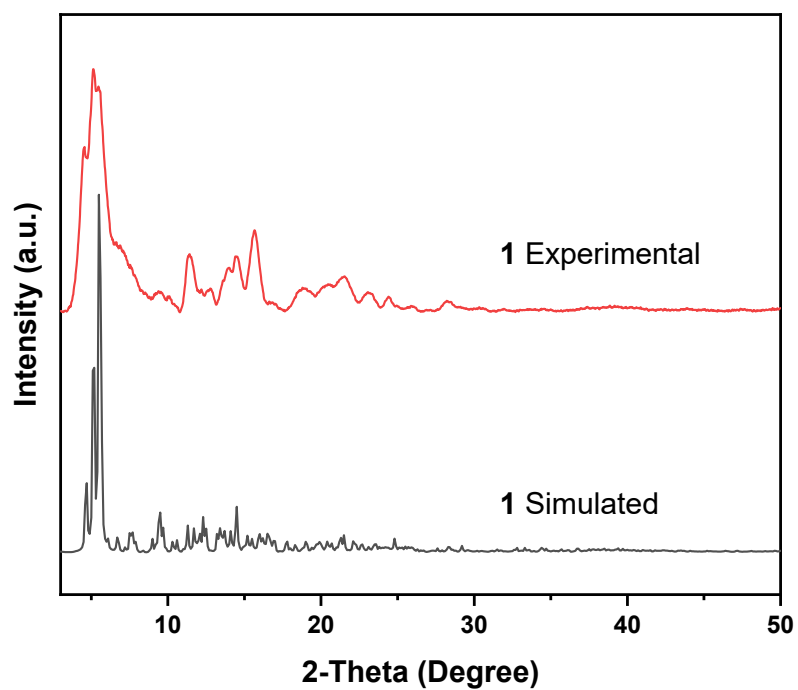

**Figure S1.** Powder X-ray diffraction (PXRD) pattern of **1**.

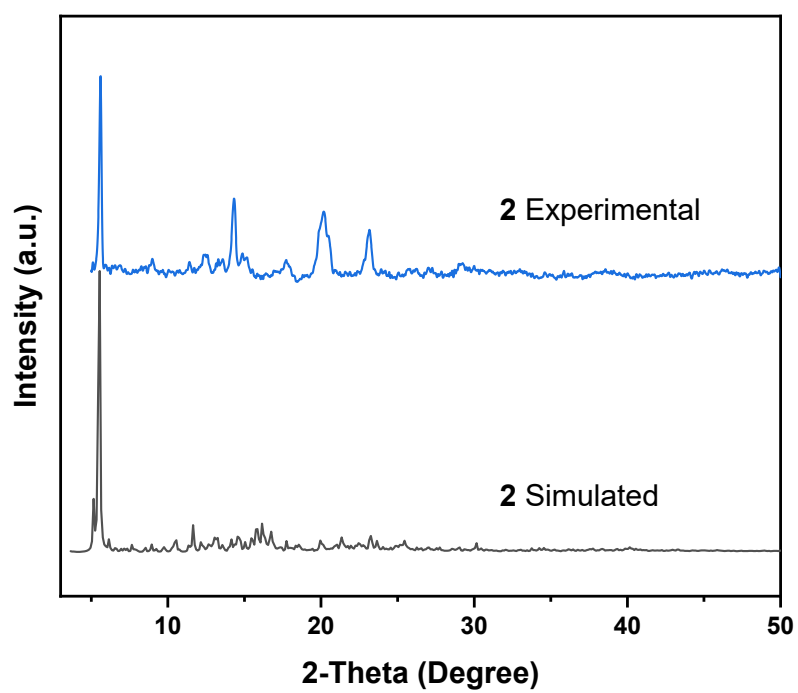

**Figure S2.** Powder X-ray diffraction (PXRD) pattern of **2**.

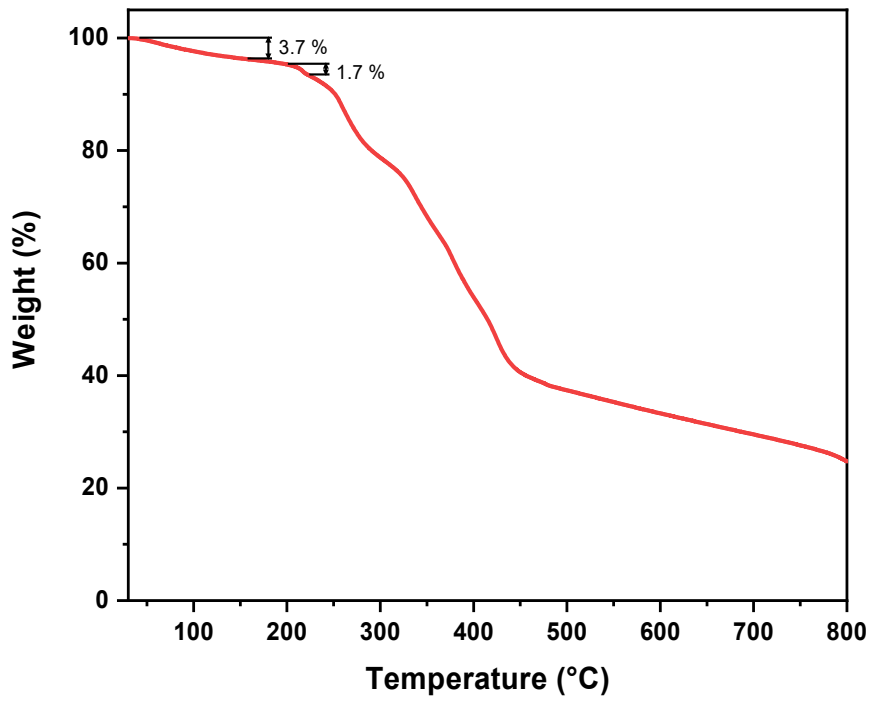

Figure S3. Thermal Gravimetric Analysis of 1.

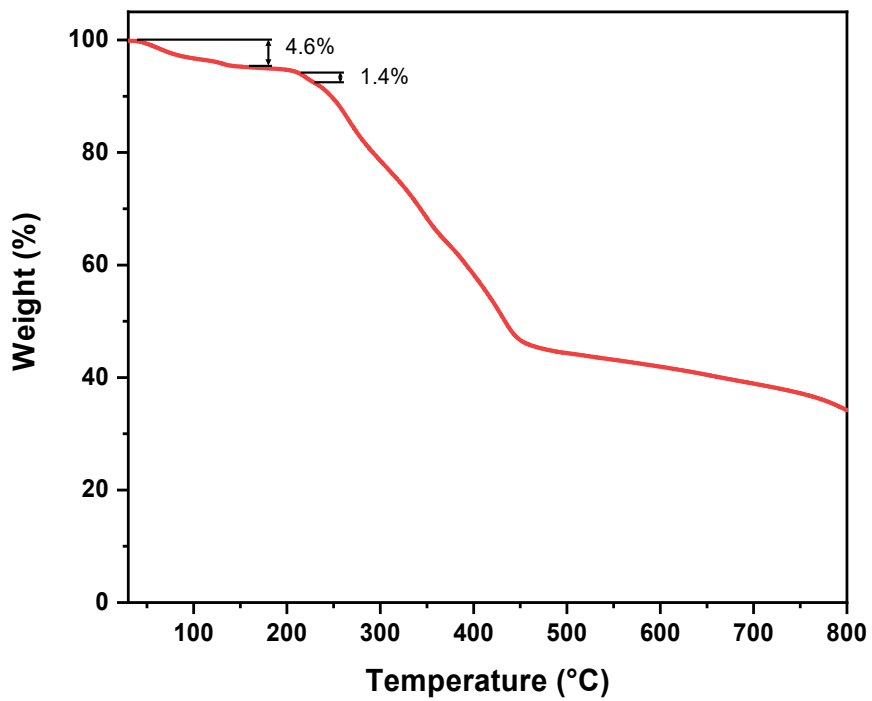

Figure S4. Thermal Gravimetric Analysis of 2.

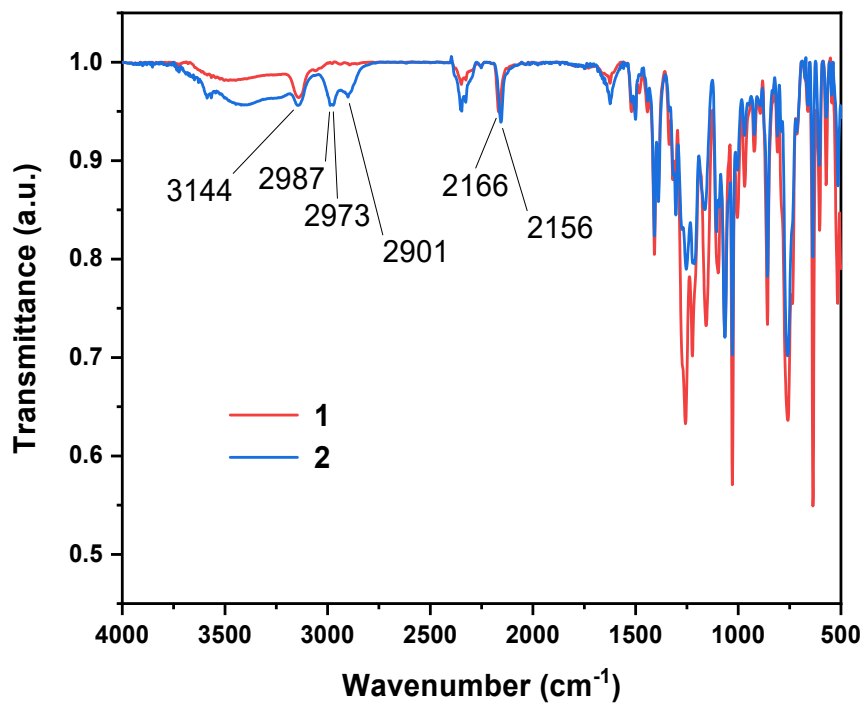

Figure S5. Solid-state IR spectra at room temperature of **1** and **2**.

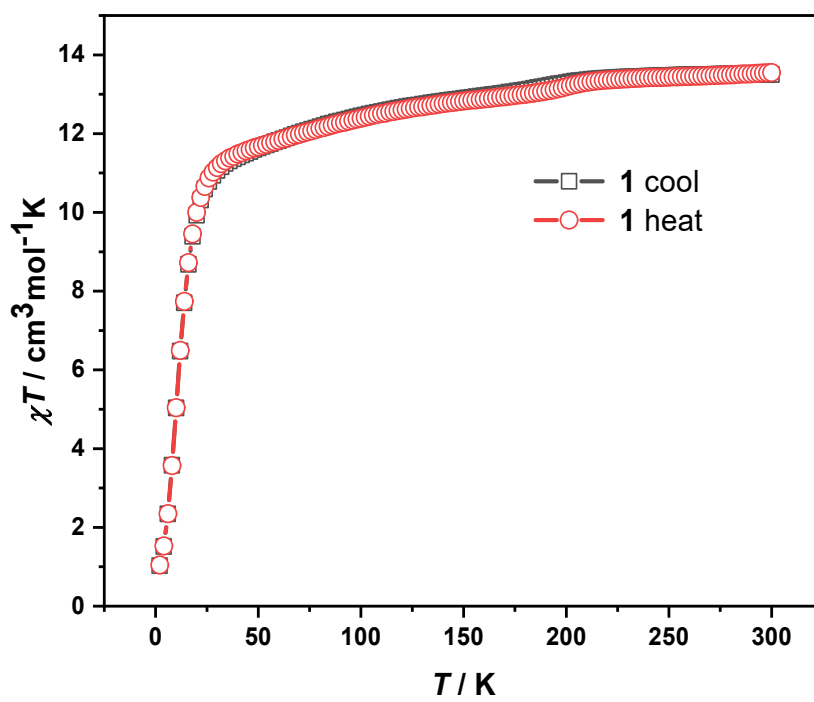

Figure S6. Variable-temperature magnetic susceptibilities of complex **1**.

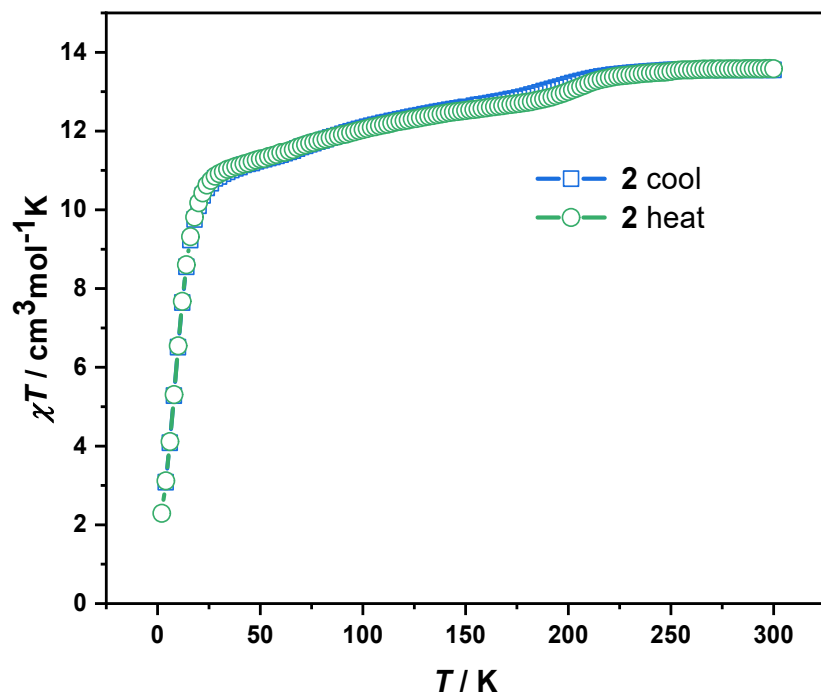

Figure S7. Variable-temperature magnetic susceptibilities of complex 2.

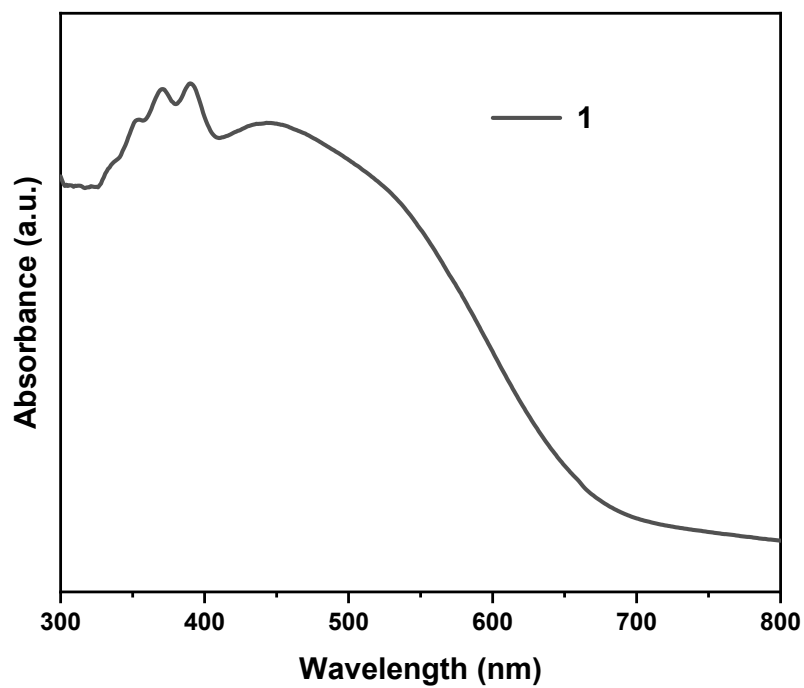

Figure S8. Solid-state UV-vis spectra of 1.

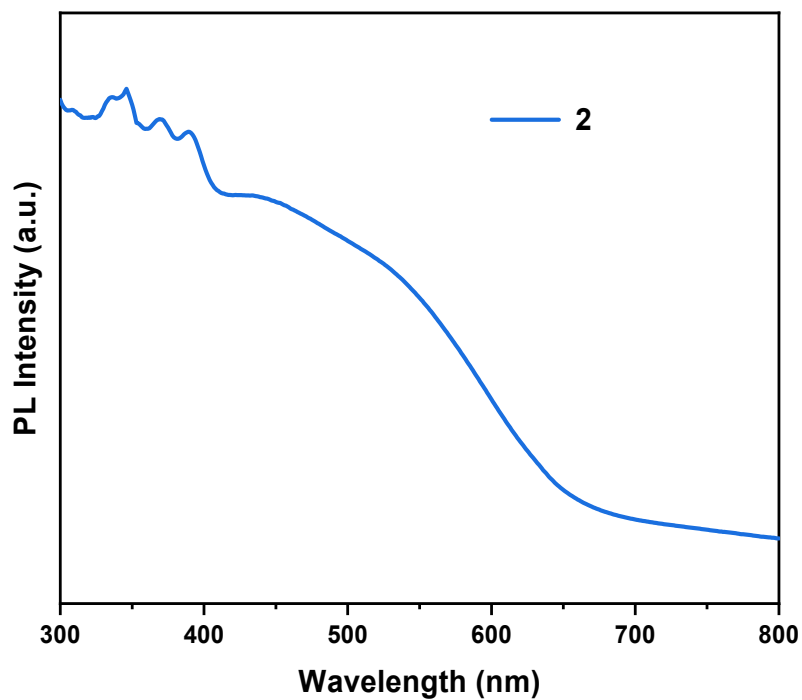

**Figure S9.** Solid-state UV-vis spectra of **2**.

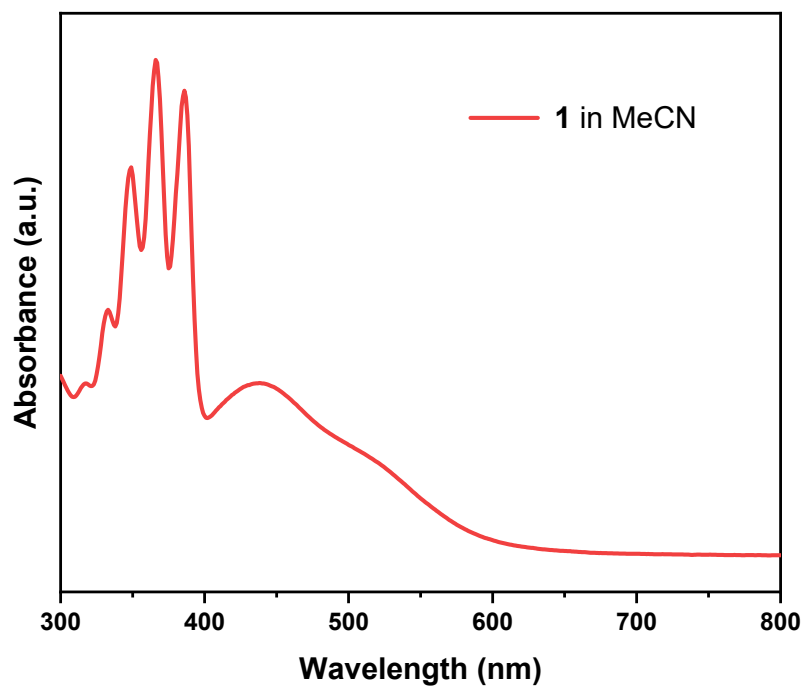

**Figure S10.** UV-vis spectra of **1** in MeCN.

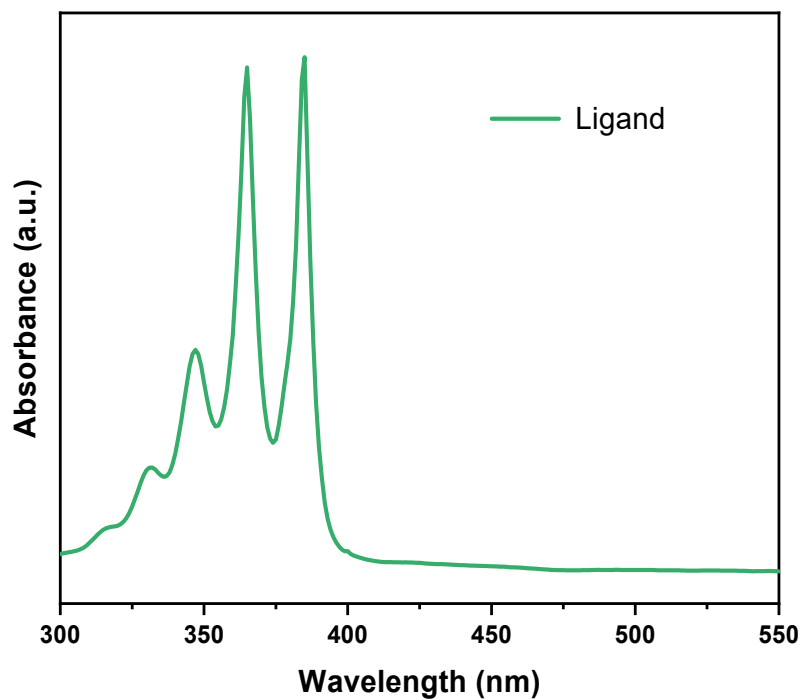

**Figure S11.** UV-vis spectra of ligand TpEtOAn in MeCN.

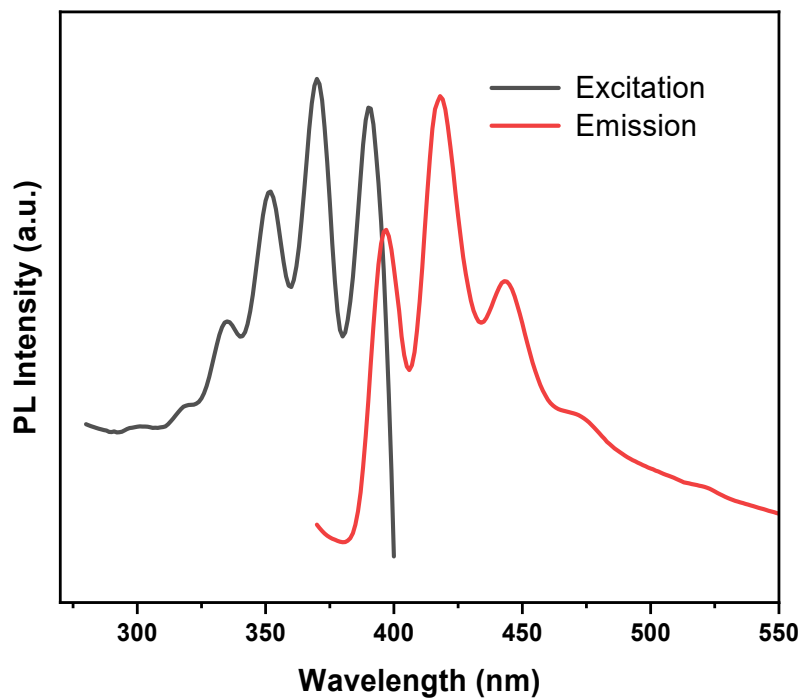

**Figure S12.** Solid-state emission ( $\lambda_{\text{ex}} = 350$  nm) and excitation ( $\lambda_{\text{em}} = 420$  nm) spectra of complex 1.



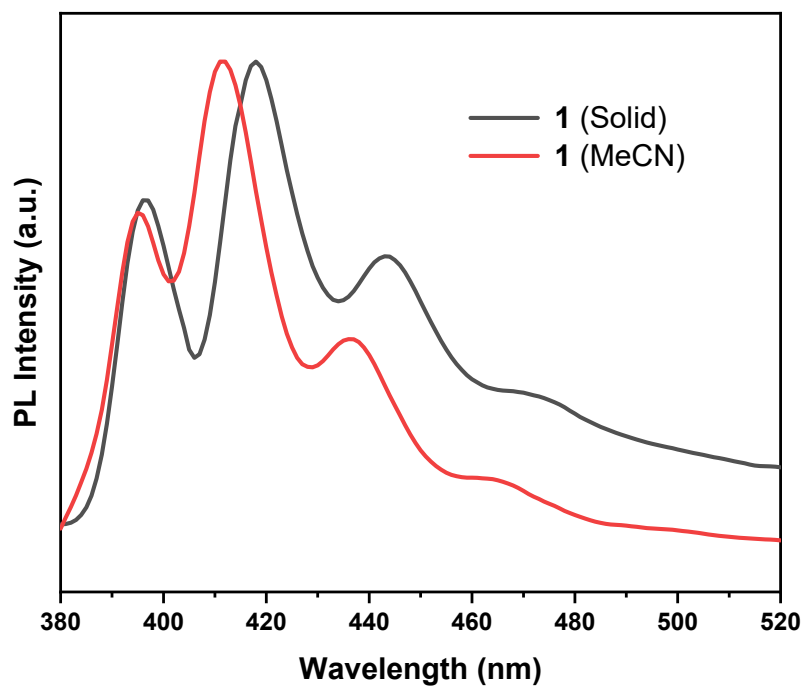

**Figure S13.** Emission ( $\lambda_{\text{ex}} = 350 \text{ nm}$ ) spectra of complex **1** at solid state and in MeCN.

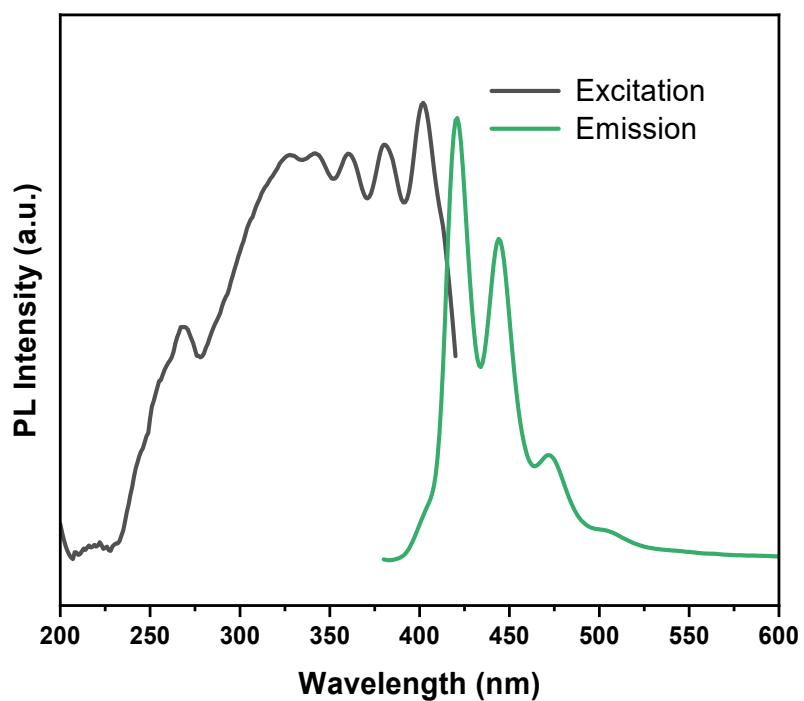

**Figure S14.** Solid-state emission ( $\lambda_{\text{ex}} = 360 \text{ nm}$ ) and excitation ( $\lambda_{\text{em}} = 444 \text{ nm}$ ) spectra of ligand TpEtOAn.

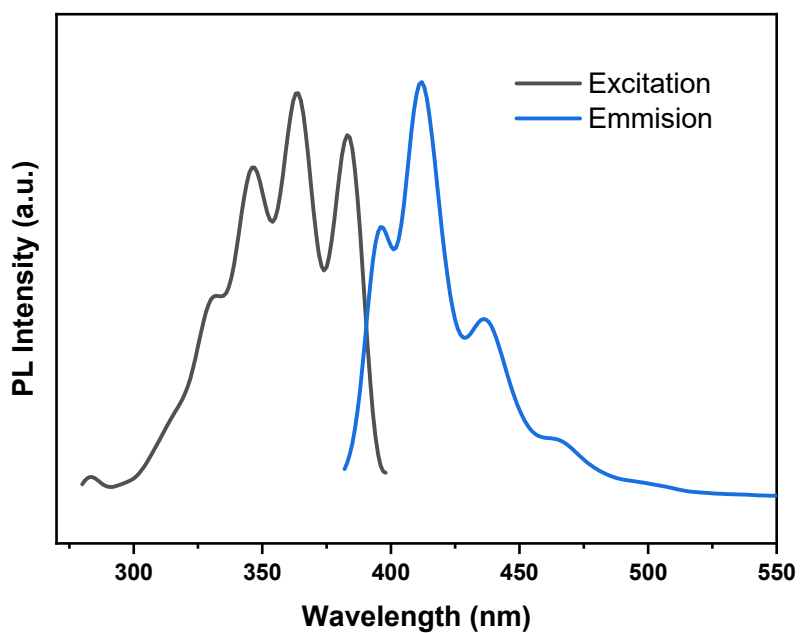

**Figure S15.** Emission ( $\lambda_{\text{ex}} = 350 \text{ nm}$ ) and excitation ( $\lambda_{\text{em}} = 420 \text{ nm}$ ) spectra of complex **2** in MeCN.

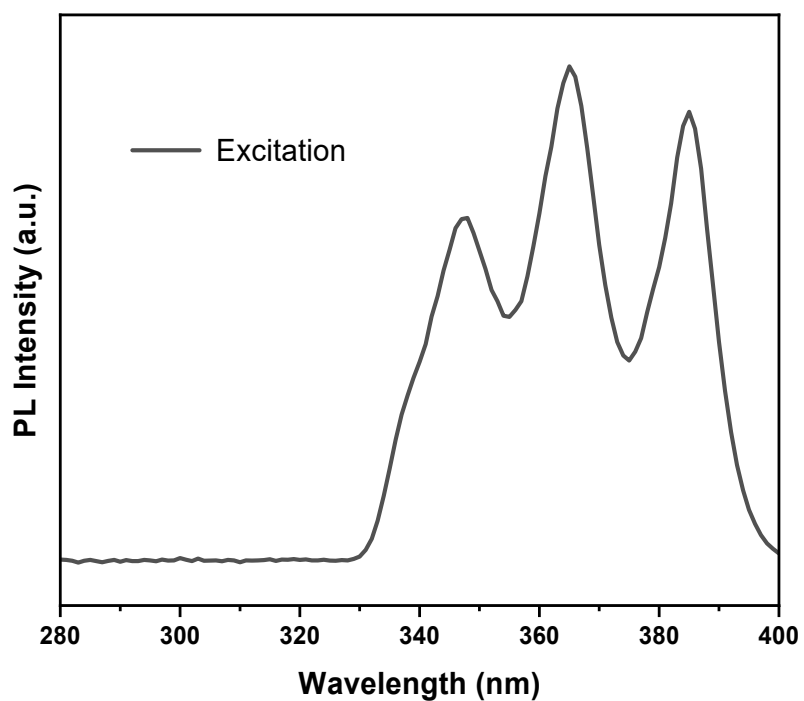

**Figure S16.** Excitation ( $\lambda_{\text{em}} = 420 \text{ nm}$ ) spectra of the mixture of **1** and PFN in MeCN.

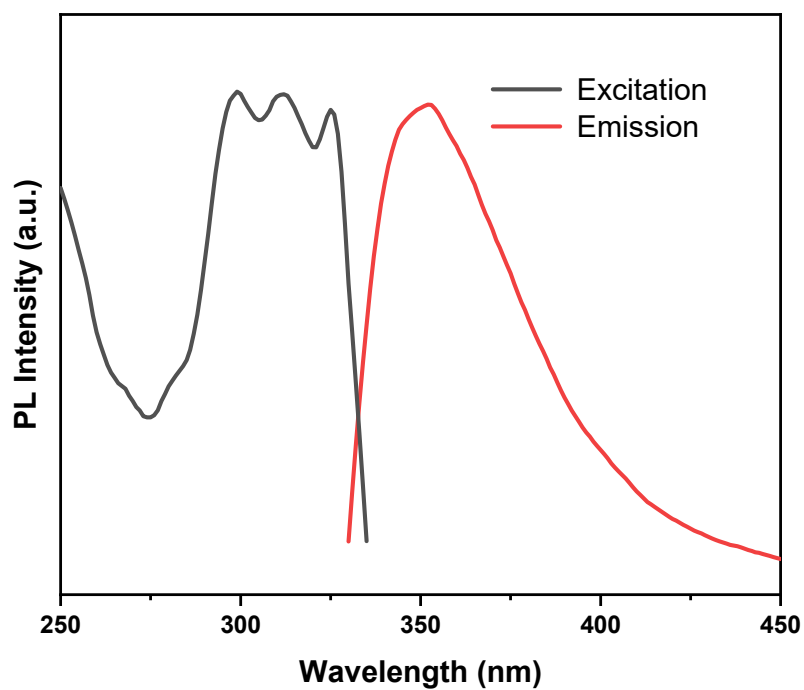

**Figure S17.** Emission ( $\lambda_{\text{ex}} = 310 \text{ nm}$ ) and excitation ( $\lambda_{\text{em}} = 355 \text{ nm}$ ) spectra of PFN in MeCN.

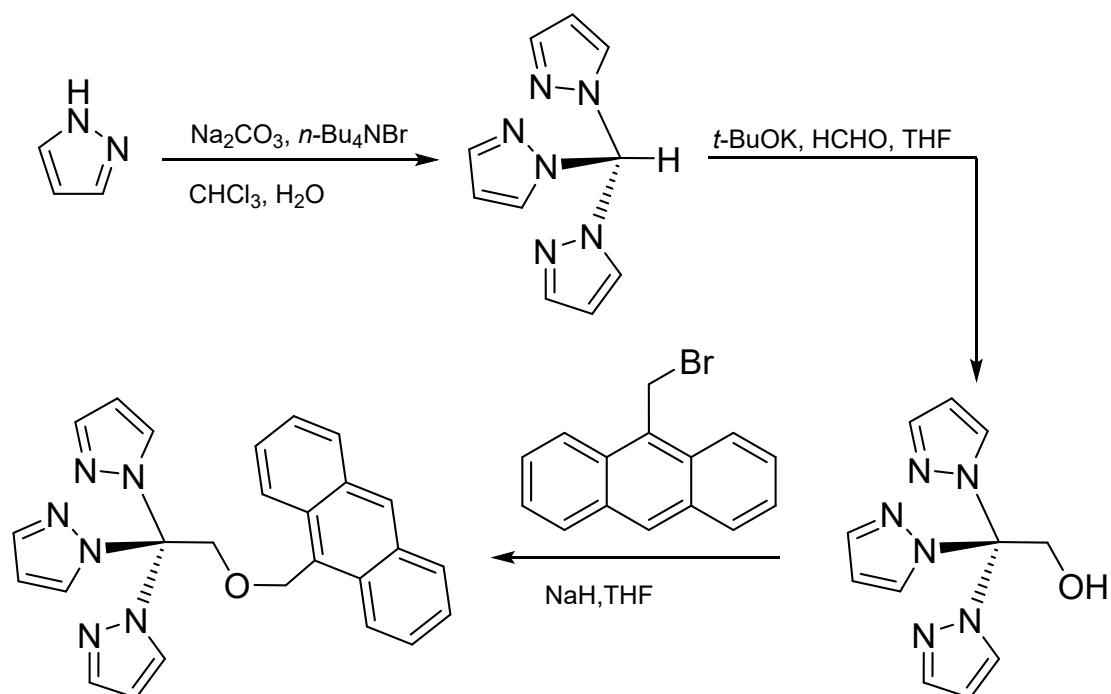

**Scheme S1.** Synthesis route of ligand TpEtOAn.

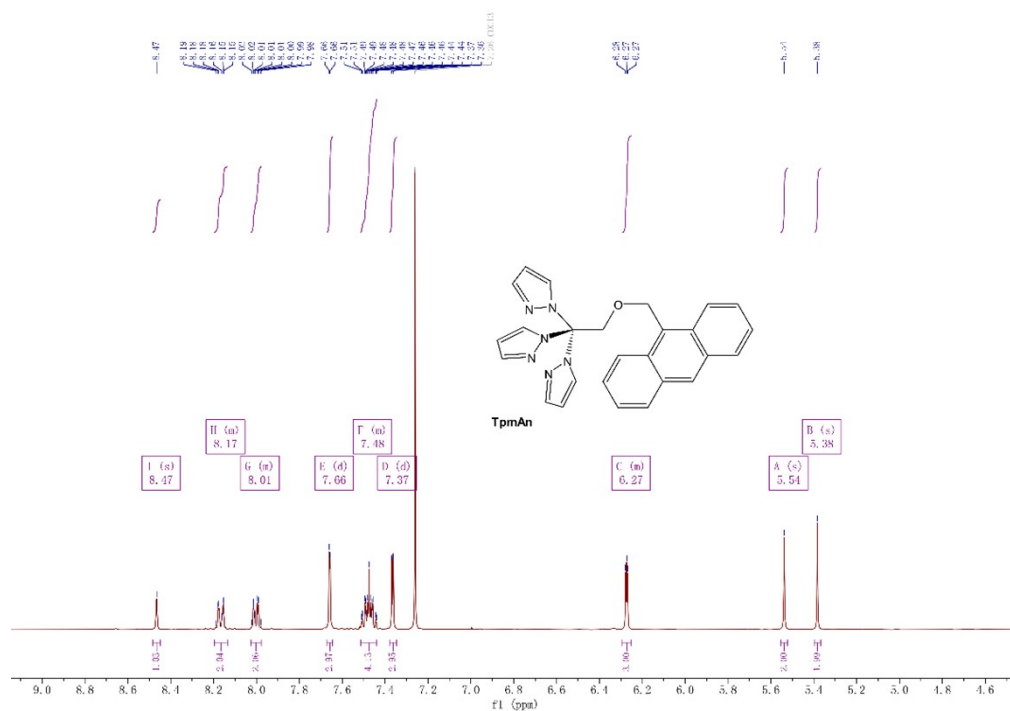

**Figure S18.**  $^1\text{H}$  NMR (400 MHz) spectra of TpEtOAn in  $\text{CDCl}_3$ .

$^1\text{H}$  NMR (400 MHz,  $\text{CDCl}_3$ )  $\delta$  8.47 (s, 1H), 8.20 – 8.14 (m, 2H), 8.03 – 7.98 (m, 2H), 7.66 (d,  $J$  = 1.8 Hz, 3H), 7.51 – 7.44 (m, 4H), 7.37 (d,  $J$  = 3.4 Hz, 3H), 6.29 – 6.25 (m, 3H), 5.54 (s, 2H), 5.38 (s, 2H).

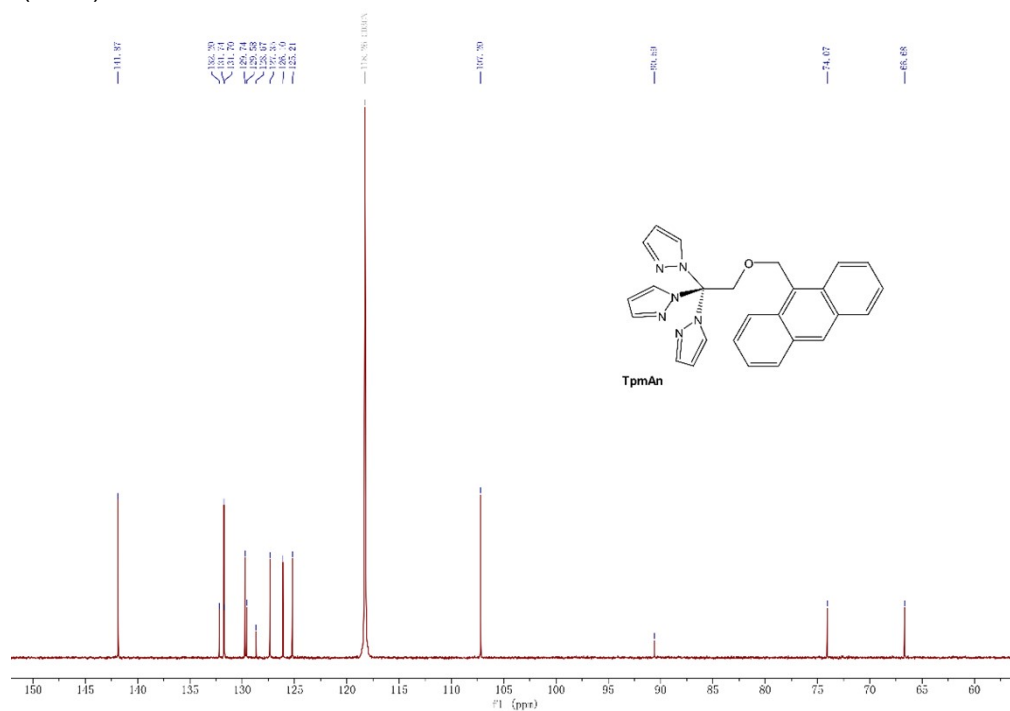

**Figure S19.**  $^{13}\text{C}$  NMR (101 MHz) spectra of TpEtOAn in  $\text{CD}_3\text{CN}$ .

$^{13}\text{C}$  NMR (101 MHz,  $\text{CD}_3\text{CN}$ )  $\delta$  141.51, 131.84, 131.38, 129.38, 129.22, 128.31, 126.99, 125.74, 124.85, 106.84, 90.23, 73.71, 66.32.

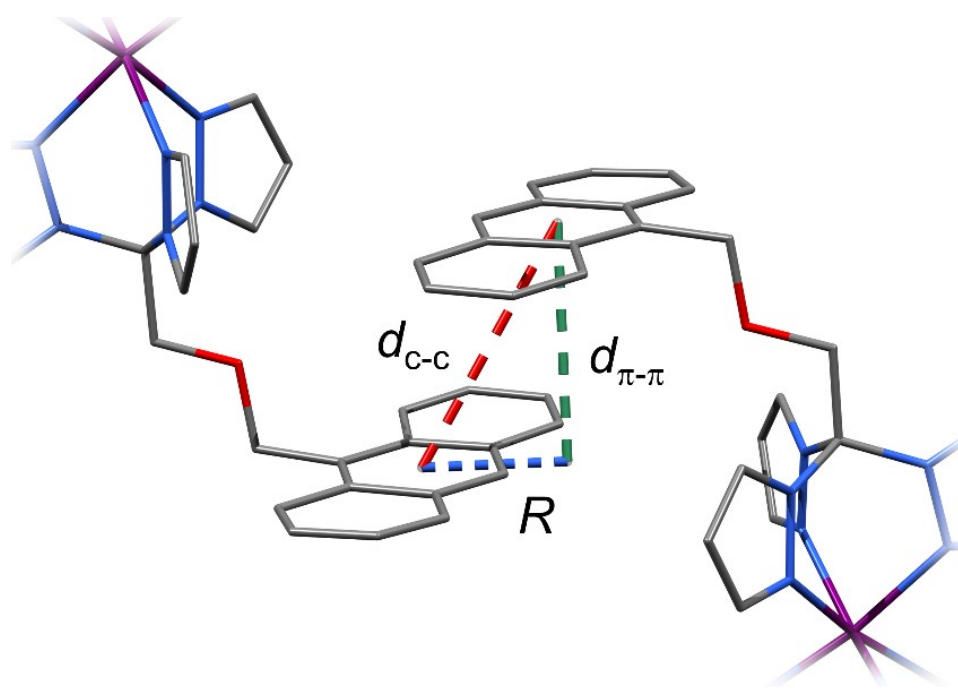

**Figure S20.** Anthracene dimer in crystal of **1** and **2**.

**Table S1.** Single Crystal diffraction data of **1** and **2**.

| Identification code                            | <b>1</b>                                         | <b>2</b>                                         |
|------------------------------------------------|--------------------------------------------------|--------------------------------------------------|
| Empirical formula                              | $C_{212}H_{230}B_4Co_4F_{12}Fe_4N_{76}O_{23}S_4$ | $C_{213}H_{221}B_4Co_4F_{21}Fe_4N_{76}O_{27}S_7$ |
| Formula weight                                 | 5069.31                                          | 5403.42                                          |
| Temperature/K                                  | 99.91                                            | 109.89                                           |
| Crystal system                                 | triclinic                                        | triclinic                                        |
| Space group                                    | $P\bar{1}$                                       | $P\bar{1}$                                       |
| $a/\text{\AA}$                                 | 19.4205(9)                                       | 18.6217(8)                                       |
| $b/\text{\AA}$                                 | 20.0866(11)                                      | 20.0661(7)                                       |
| $c/\text{\AA}$                                 | 34.3463(17)                                      | 36.4748(14)                                      |
| $\alpha/^\circ$                                | 93.235(2)                                        | 96.0810(10)                                      |
| $\beta/^\circ$                                 | 92.907(2)                                        | 91.5700(10)                                      |
| $\gamma/^\circ$                                | 108.862(2)                                       | 100.7960(10)                                     |
| Volume/ $\text{\AA}^3$                         | 12624.8(11)                                      | 13297.2(9)                                       |
| Z                                              | 2                                                | 2                                                |
| $\rho_{\text{calc}}/\text{g/cm}^3$             | 1.334                                            | 1.350                                            |
| $\mu/\text{mm}^{-1}$                           | 0.596                                            | 0.598                                            |
| F(000)                                         | 5244.0                                           | 5560.0                                           |
| Crystal size/ $\text{mm}^3$                    | 0.5 × 0.3 × 0.2                                  | 0.55 × 0.38 × 0.31                               |
| Radiation                                      | MoK $\alpha$ ( $\lambda = 0.71073$ )             | MoK $\alpha$ ( $\lambda = 0.71073$ )             |
| 2 $\theta$ range for data collection/ $^\circ$ | 4.444 to 49.636                                  | 4.446 to 49.606                                  |

|                                             |                                                                |                                                                |
|---------------------------------------------|----------------------------------------------------------------|----------------------------------------------------------------|
| Index ranges                                | -22 ≤ h ≤ 22, -23 ≤ k ≤ 23, -40 ≤ l ≤ 40                       | -21 ≤ h ≤ 21, -23 ≤ k ≤ 23, -42 ≤ l ≤ 43                       |
| Reflections collected                       | 120789                                                         | 153765                                                         |
| Independent reflections                     | 43028 [R <sub>int</sub> = 0.0597, R <sub>sigma</sub> = 0.0761] | 45483 [R <sub>int</sub> = 0.0873, R <sub>sigma</sub> = 0.0962] |
| Data/restraints/parameters                  | 43028/1400/3037                                                | 45483/2393/3916                                                |
| Goodness-of-fit on F <sup>2</sup>           | 1.033                                                          | 1.025                                                          |
| Final R indexes [I >= 2σ (I)]               | R <sub>1</sub> = 0.0944, wR <sub>2</sub> = 0.02522             | R <sub>1</sub> = 0.0907, wR <sub>2</sub> = 0.2513              |
| Final R indexes [all data]                  | R <sub>1</sub> = 0.1501, wR <sub>2</sub> = 0.3098              | R <sub>1</sub> = 0.1255, wR <sub>2</sub> = 0.2950              |
| Largest diff. peak/hole / e Å <sup>-3</sup> | 1.54/-0.86                                                     | 1.17/-0.97                                                     |

**Table S2.** The selected bond length of complex 1.

|            |          |            |          |
|------------|----------|------------|----------|
| <b>Co1</b> |          | <b>Co2</b> |          |
| Co1–N7     | 2.076(5) | Co2–N10    | 2.061(5) |
| Co1–N8     | 2.081(6) | Co2–N11    | 2.060(6) |
| Co1–N9     | 2.078(6) | Co2–N12    | 2.064(6) |
| Co1–N19    | 2.109(5) | Co2–N22    | 2.104(5) |
| Co1–N20    | 2.106(5) | Co2–N23    | 2.132(5) |
| Co1–N21    | 2.112(5) | Co2–N24    | 2.112(5) |
| <b>Co3</b> |          | <b>Co4</b> |          |
| Co3–N1     | 2.071(5) | Co4–N4     | 2.061(5) |
| Co3–N2     | 2.072(5) | Co4–N5     | 2.074(5) |
| Co3–N3     | 2.059(5) | Co4–N6     | 2.049(6) |
| Co3–N13    | 2.115(5) | Co4–N16    | 2.118(5) |
| Co3–N14    | 2.121(5) | Co4–N17    | 2.117(5) |
| Co3–N15    | 2.144(6) | Co4–N18    | 2.125(5) |
| <b>Fe1</b> |          | <b>Fe2</b> |          |
| Fe1–C7     | 1.956(7) | Fe2–C10    | 1.969(8) |
| Fe1–C8     | 1.934(7) | Fe2–C11    | 1.936(7) |
| Fe1–C9     | 1.928(7) | Fe2–C12    | 1.962(7) |
| Fe1–N31    | 1.989(5) | Fe2–N34    | 1.973(6) |
| Fe1–N32    | 1.976(5) | Fe2–N35    | 1.949(5) |
| Fe1–N33    | 1.977(6) | Fe2–N36    | 1.983(6) |
| <b>Fe3</b> |          | <b>Fe4</b> |          |
| Fe3–C1     | 1.944(6) | Fe4–C4     | 1.949(6) |
| Fe3–C2     | 1.934(6) | Fe4–C5     | 1.938(7) |
| Fe3–C3     | 1.943(6) | Fe4–C6     | 1.950(7) |
| Fe3–N25    | 1.975(5) | Fe4–N28    | 2.000(5) |
| Fe3–N26    | 1.969(4) | Fe4–N29    | 1.987(5) |
| Fe3–N27    | 1.978(5) | Fe4–N30    | 1.989(5) |

**Table S3.** Selected bond length of complex 2.

|            |          |            |          |
|------------|----------|------------|----------|
| <b>Co1</b> |          | <b>Co2</b> |          |
| Co1–N1     | 2.091(4) | Co2–N4     | 2.070(4) |
| Co1–N2     | 2.081(4) | Co2–N5     | 2.057(4) |
| Co1–N3     | 2.068(4) | Co2–N6     | 2.080(4) |
| Co1–N13    | 2.133(4) | Co2–N19    | 2.150(4) |
| Co1–N14    | 2.095(4) | Co2–N20    | 2.105(4) |
| Co1–N15    | 2.165(4) | Co2–N21    | 2.111(4) |
| <b>Co3</b> |          | <b>Co4</b> |          |
| Co3–N7     | 2.073(5) | Co4–N10    | 2.077(4) |
| Co3–N8     | 2.078(4) | Co4–N11    | 2.078(5) |
| Co3–N9     | 2.070(5) | Co4–N12    | 2.076(5) |
| Co3–N34    | 2.126(6) | Co4–N25    | 2.128(4) |
| Co3–N35    | 2.110(6) | Co4–N26    | 2.116(4) |
| Co3–N36    | 2.124(5) | Co4–N27    | 2.133(4) |
| <b>Fe1</b> |          | <b>Fe2</b> |          |
| Fe1–C1     | 1.926(5) | Fe2–C4     | 1.910(5) |
| Fe1–C2     | 1.923(5) | Fe2–C5     | 1.924(5) |
| Fe1–C3     | 1.942(6) | Fe2–C6     | 1.924(5) |
| Fe1–N16    | 1.993(4) | Fe2–N22    | 1.971(4) |
| Fe1–N17    | 1.958(4) | Fe2–N23    | 1.961(4) |
| Fe1–N18    | 1.960(4) | Fe2–N24    | 1.964(4) |
| <b>Fe3</b> |          | <b>Fe4</b> |          |
| Fe3–C7     | 1.928(6) | Fe4–C10    | 1.936(5) |
| Fe3–C8     | 1.919(5) | Fe4–C11    | 1.915(6) |
| Fe3–C9     | 1.920(6) | Fe4–C12    | 1.939(6) |
| Fe3–N31    | 1.970(5) | Fe4–N28    | 1.973(5) |
| Fe3–N32    | 1.971(4) | Fe4–N29    | 1.961(5) |
| Fe3–N33    | 1.965(5) | Fe4–N30    | 1.966(5) |

**Table S4.** Average Co–N bond length and continuous shape measurement of Co centers.

|                                                    | <b>1</b> | <b>2</b> |
|----------------------------------------------------|----------|----------|
| Average Co–N <sub>cyanide</sub><br>bond length (Å) | 2.067    | 2.075    |
| Average Co–N <sub>ligand</sub><br>bond length (Å)  | 2.118    | 2.125    |
| CShMCo                                             | 0.217    | 0.271    |
